# Supplementary material
Source: Springer Nature journal article supplement (https://www.springermedizin.de/resource/supplementary/12889_2011_3010_MOESM1_ESM.pdf/9487970)
Supplement: MOESM1 [file 9487970]

65 urban secondary schools were invited per mail. Additionally, other secondary schools were invited per advertisement in a daily newspaper and via announcement in a local radio station.

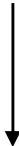

12 urban schools agreed to take part.  
6 schools answered at the advertisement.

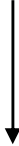

3 schools were excluded, they were located beyond the intervention area.

15 schools with 32 classes were randomized  
(n=792 children).

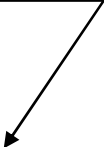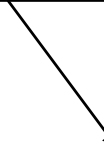

Intervention group  
4 general schools, 4 intermediate schools (n = 426 children)  
344 children with written consent

Control group  
4 general schools, 3 intermediate schools (n = 366 children)  
279 children with written consent
